# Supplementary material
Source: PubMed Central journal article supplement (PMC6583100)

## Supplementary Online Content

Arnold SV, Li Z, Vemulapalli S, et al. Association of transcatheter mitral valve repair with quality of life outcomes at 30 days and 1 year: analysis of the Transcatheter Valve Therapy Registry. *JAMA Cardiol*. Published online November 21, 2018. doi:10.1001/jamacardio.2018.3359

**eTable.** Baseline characteristics of CMS linked patients surviving 1 year<sup>1</sup>, according to presence of 1-year KCCQ data

**eFigure 1.** Categorical outcomes at 30 days and 1 year after TMVR.

**eFigure 2.** Mean KCCQ-OS scores over time among 917 patients with complete data.

This supplementary material has been provided by the authors to give readers additional information about their work.

| <b>eTable. Baseline characteristics of CMS linked patients surviving 1 year<sup>1</sup>, according to presence of 1-year KCCQ data</b>                     |                                 |                                 |                |
|------------------------------------------------------------------------------------------------------------------------------------------------------------|---------------------------------|---------------------------------|----------------|
|                                                                                                                                                            | <b>Patients with KCCQ n=942</b> | <b>Missing KCCQ Data n=1046</b> | <b>P-value</b> |
| Age (y)                                                                                                                                                    | 83 (77-86)                      | 82 (76-87)                      | 0.583          |
| Female                                                                                                                                                     | 445 (47.2%)                     | 481 (46.0%)                     | 0.575          |
| Caucasian race                                                                                                                                             | 878 (93.2%)                     | 965 (92.3%)                     | 0.416          |
| Body surface area (m <sup>2</sup> )                                                                                                                        | 1.8 (1.6-2.0)                   | 1.8 (1.6-2.0)                   | 0.933          |
| Prior myocardial infarction                                                                                                                                | 235 (25.1%)                     | 268 (25.6%)                     | 0.762          |
| Prior percutaneous coronary intervention                                                                                                                   | 296 (31.5%)                     | 305 (29.3%)                     | 0.283          |
| Prior coronary artery bypass surgery                                                                                                                       | 285 (30.4%)                     | 342 (33.0%)                     | 0.216          |
| Peripheral artery disease                                                                                                                                  | 162 (17.2%)                     | 201 (19.2%)                     | 0.245          |
| Atrial fibrillation/flutter                                                                                                                                | 588 (62.4%)                     | 687 (65.8%)                     | 0.116          |
| Permanent pacemaker                                                                                                                                        | 180 (19.1%)                     | 207 (19.8%)                     | 0.702          |
| Ejection fraction (%)                                                                                                                                      | 55.0 (45.0-63.0)                | 55.0 (45.0-63.0)                | 0.790          |
| Prior stroke                                                                                                                                               | 103 (10.9%)                     | 100 (9.6%)                      | 0.309          |
| Diabetes mellitus                                                                                                                                          | 218 (23.1%)                     | 260 (25.0%)                     | 0.347          |
| Treated with insulin                                                                                                                                       | 54 (24.8%)                      | 85 (32.8%)                      | 0.054          |
| Severe lung disease                                                                                                                                        | 86 (9.2%)                       | 110 (10.6%)                     | 0.285          |
| Home oxygen                                                                                                                                                | 135 (14.3%)                     | 134 (12.8%)                     | 0.327          |
| Current smoker                                                                                                                                             | 34 (3.6%)                       | 50 (4.8%)                       | 0.192          |
| Hemoglobin (g/dL)                                                                                                                                          | 12.3 (11.1-13.4)                | 12.2 (10.9-13.4)                | 0.233          |
| Glomerular filtration rate (mL/min/1.73 m <sup>2</sup> )                                                                                                   | 55.7 (41.8-71.5)                | 56.0 (42.5-71.3)                | 0.980          |
| Current dialysis                                                                                                                                           | 15 (1.6%)                       | 19 (1.8%)                       | 0.700          |
| STS mortality risk score (%)                                                                                                                               | 5.7 (3.8-8.8)                   | 6.2 (3.9-9.5)                   | 0.028          |
| Mitral valve mean gradient (mmHg)                                                                                                                          | 2.0 (2.0-4.0)                   | 3.0 (2.0-4.0)                   | 0.080          |
| Moderate/severe aortic insufficiency                                                                                                                       | 74 (7.9%)                       | 93 (9.0%)                       | 0.396          |
| Functional mitral regurgitation                                                                                                                            | 133 (14.1%)                     | 131 (12.5%)                     | 0.296          |
| Degenerative mitral regurgitation                                                                                                                          | 853 (90.6%)                     | 924 (88.3%)                     | 0.109          |
| Acuity of procedure                                                                                                                                        |                                 |                                 | 0.007          |
| Elective                                                                                                                                                   | 873 (92.8%)                     | 932 (89.3%)                     |                |
| Urgent                                                                                                                                                     | 35 (3.7%)                       | 60 (5.7%)                       |                |
| Shock/Inotropes/Assist Device                                                                                                                              | 28 (3.0%)                       | 51 (4.9%)                       |                |
| Emergency/Salvage/Cardiac Arrest                                                                                                                           | 5 (0.5%)                        | 1 (0.1%)                        |                |
| Baseline KCCQ-OS                                                                                                                                           | 41.7 (24.0-59.4)                | 39.6 (22.4-57.3)                | 0.087          |
| 6-minute walk test (m)                                                                                                                                     | 213.4 (122.8-300.5)             | 198.1 (109.7-280.1)             | 0.016          |
| KCCQ-OS, Kansas City Cardiomyopathy Questionnaire-overall summary score; STS, Society for Thoracic Surgeons                                                |                                 |                                 |                |
| Data are expressed as n (%) or median (interquartile range)                                                                                                |                                 |                                 |                |
| <sup>1</sup> 3269 patients eligible for 1 year follow-up → 3023 patients ≥65 years of age → 2583 patients linked to CMS (required to know survival status) |                                 |                                 |                |



**eFigure 1. Categorical outcomes at 30 days and 1 year after TMVR.** Changes in the KCCQ-OS of 5, 10, and 20 points correspond to small, moderate or large clinical improvements, respectively.

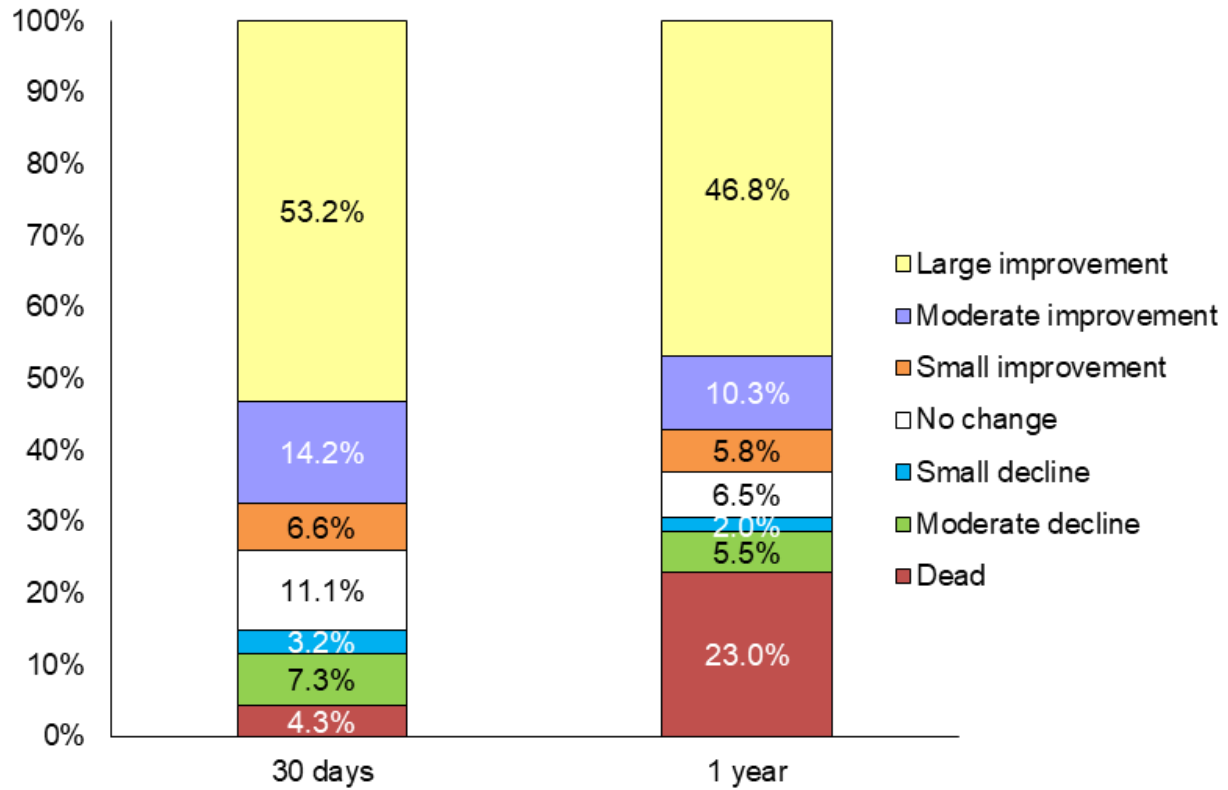

**eFigure 2. Mean KCCQ-OS scores over time among 917 patients with complete data**

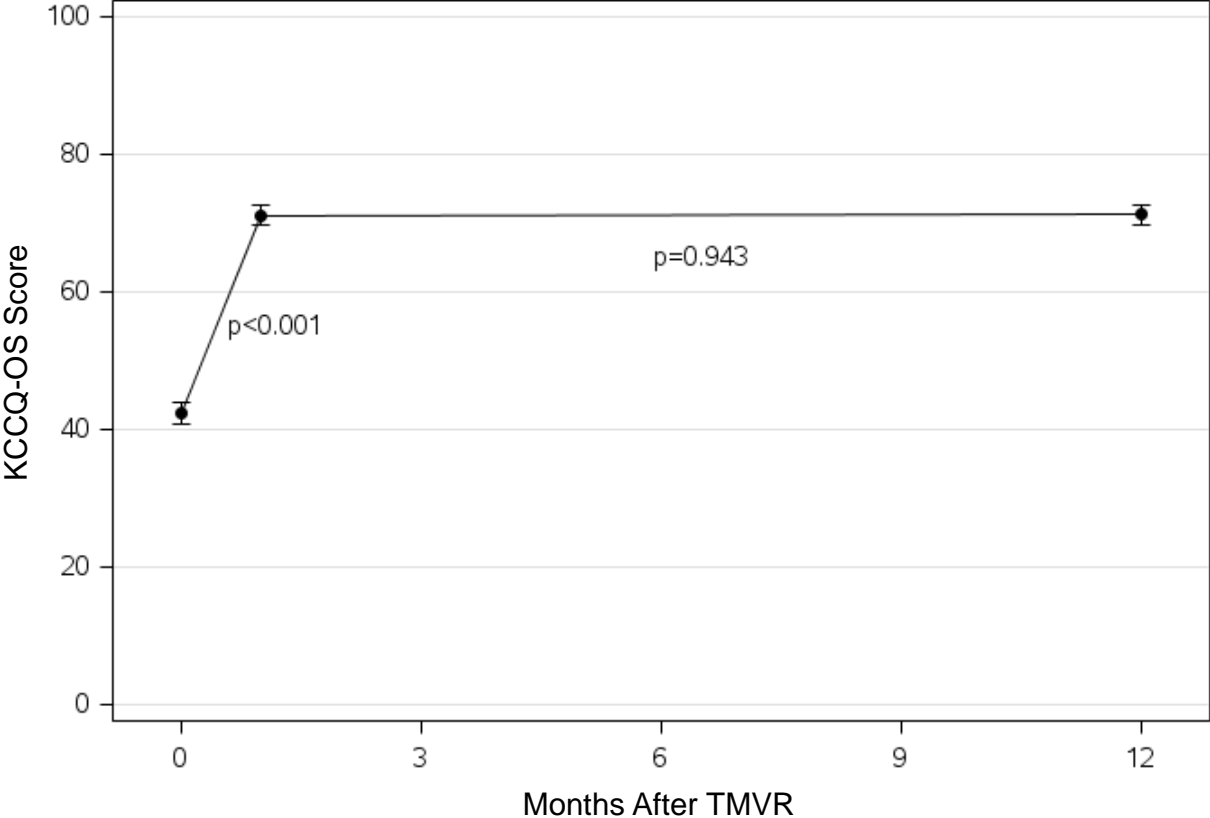

Supplement: jamacardiol-3-1151-s001.pdf [file jamacardiol-3-1151-s001.pdf]
